# Supplementary material for: Intersectional Cre Driver Lines Generated Using Split-Intein Mediated Split-Cre Reconstitution
Source: PubMed Central journal article supplement — Sci Rep. 2012 Jul 6;2:497. doi: 10.1038/srep00497 (PMC3390602; doi:10.1038/srep00497), 2012-07-06
Supplement: srep00497-s1.pdf [file srep00497-s1.pdf]

# **Intersectional Cre Driver Lines Generated Using Split-Intein Mediated Split-Cre Reconstitution**

Ping Wang<sup>1</sup>, Tianrui Chen<sup>1,2</sup>, Katsuyasu Sakurai<sup>1</sup>, Bao-Xia Han<sup>1</sup>, Zhigang He<sup>3</sup>, Guoping Feng<sup>4</sup>,  
and Fan Wang<sup>1,\*</sup>

## **Supplementary materials**

### **Supplementary Figure 1. Split-intein mediated efficient split-Cre reconstitution in cultured cortical slices.**

Ex vivo electroporation of pCAGGS-Cre or split-Intein tagged pCAGGS-Split-Cre into cortices of E14.5 Rosa-loxp-STOP-loxp-tdTomato mouse embryos followed by organotypic culture. Equal amount of pCAGGS-mVenus was co-electroporated as a reference for transfection.

- a**, Electroporation of pCAGGS-mVenus and pCAGGS-Cre
- b**, Electroporation of pCAGGS-mVenus and pCAGGS-Cre-N-Intein-N
- c**, Electroporation of pCAGGS-mVenus and pCAGGS-Intein-C-Cre-C
- d**, Electroporation of pCAGGS-mVenus, pCAGGS-Cre-N-Intein-N and pCAGGS-Intein-C-Cre-C

### **Supplementary Figure 2. Schematic representation and summary of the transgenic constructs and mouse lines.**

- a**, Schematic drawing of the cloning vector and generation of transgenes. The fusion proteins encoding the Cre-N-intein-N or intein-C-Cre-C were ligated with IRES, the internal ribosome entry site, and further inserted into the unique NcoI site of the Hsp68LacZ gateway vector which contains the human enhancers of interest, a small promoter of the heat-shock protein 68, as well as the lacZ reporter gene.
- b**, Schematic drawing of the 5 transgenic constructs.
- c**, Summary of the pairs of enhancers used to develop split-Cre reconstitution transgenic lines.

Supplementary Figure 1

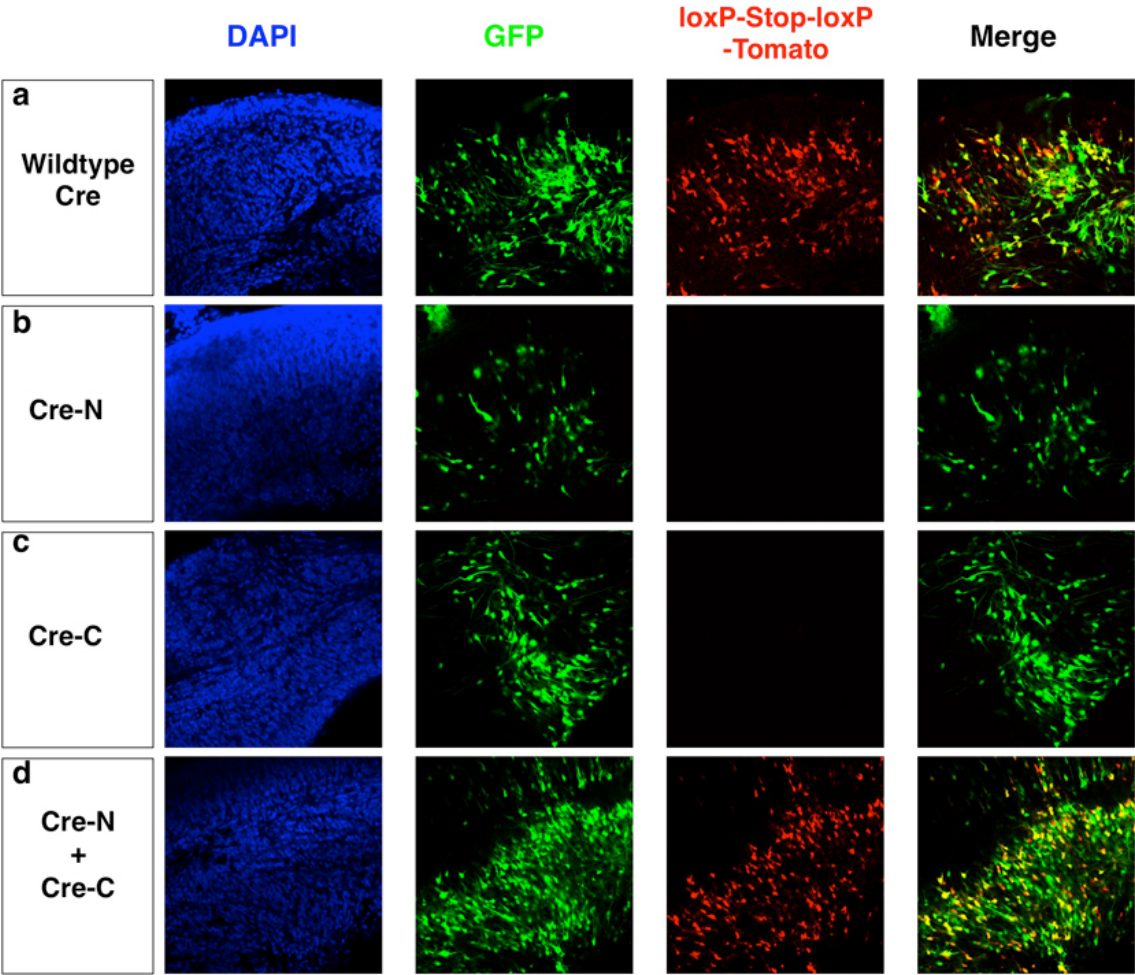

## Supplementary Figure 2

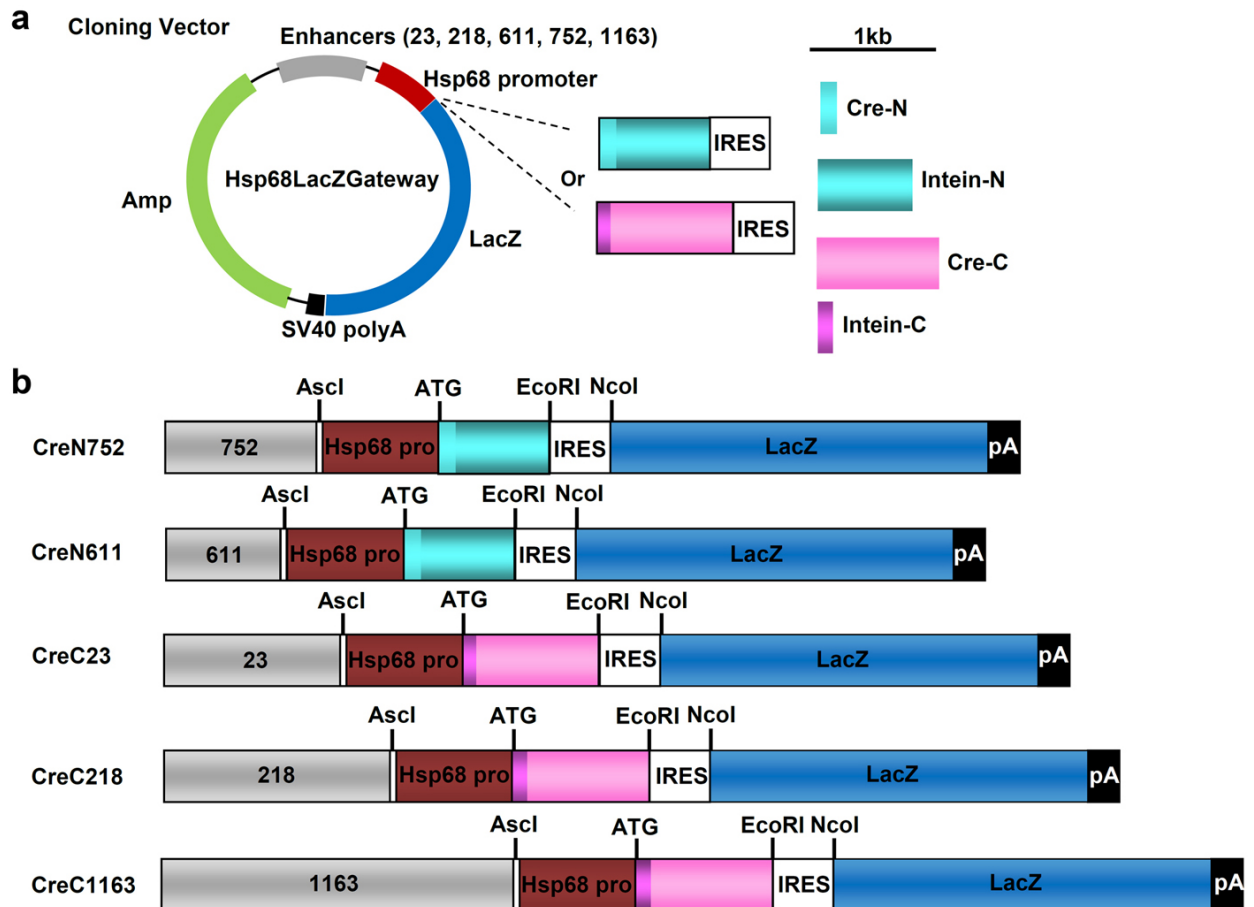

**c**

| Combination of enhancers     | Intersectional Expression Pattern                 | Construct                                                     |
|------------------------------|---------------------------------------------------|---------------------------------------------------------------|
| en-752 /en-1163 <sup>a</sup> | Trigeminal Ganglion                               | 752-Cre-N-Intein-N-IRES-LacZ<br>1163-Intein-C-Cre-C-IRES-LacZ |
| en-611/en-23 <sup>a</sup>    | Hindbrain                                         | 611-Cre-N-Intein-N-IRES-LacZ<br>23-Intein-C-Cre-C-IRES-LacZ   |
| en-611/en-218 <sup>a</sup>   | Subsets neurons in cortex, midbrain and hindbrain | 611-Cre-N-Intein-N-IRES-LacZ<br>218-Intein-C-Cre-C-IRES-LacZ  |

<sup>a</sup> Detailed information of selected human enhancers are available in the enhancer database (<http://enhancer.lbl.gov>)
